# Supplementary material
Source: Royal Society of Chemistry journal article supplement (doi:10.1039/d6an00392c)
Supplement: d6an00392c1.pdf [file d6an00392c1.pdf]

## Supporting Information

### **A Reagent-Free Binding Assay for Cholera Toxin Based on Sequestration Electrochemistry Using Lactose-Functionalized Magnetic Microbeads**

Mariwo Ikeuchi,<sup>a</sup> K. S. Shalini Devi,<sup>a</sup> Kazuto Sazawa,<sup>a</sup> Kazuharu Sugawara<sup>b</sup> and Hideki Kuramitz<sup>\*a</sup>

<sup>a</sup> *Department of Natural and Environmental Sciences, Faculty of Science, Academic Assembly, University of Toyama, Gofuku, Toyama 930-8555, Japan.*

<sup>b</sup> *Faculty of Engineering, Maebashi Institute of Technology, Maebashi, Gunma 371-816, Japan.*

\* To whom correspondence should be addressed. E-mail: [kuramitz@sci.u-toyama.ac.jp](mailto:kuramitz@sci.u-toyama.ac.jp)

**Table S1.** Comparison of representative cholera toxin detection methods reported in the literature and the proposed sequestration electrochemistry assay.

| <b>Method</b>                                             | <b>LOD</b> | <b>Assay time</b> | <b>Remarks</b>                                                                     | <b>Ref.</b> |
|-----------------------------------------------------------|------------|-------------------|------------------------------------------------------------------------------------|-------------|
| Latex agglutination assay                                 | 1–2 ng/mL  | 20–24 h           | Commercially available; simple but time-consuming                                  | 33          |
| Nanocoax-based electrochemical ELISA                      | 2 ng/mL    | 2–3 h             | High sensitivity; requires antibody immobilization and nanostructured electrodes   | 39          |
| Magnetic frequency mixing immunoassay                     | 0.2 ng/mL  | >2 h              | Sensitive magnetic immunoassay                                                     | 41          |
| Carbohydrate microarray with fluorescence detection       | ~2 ng/mL   | <3 h              | Fluorescence-based detection; microarray fabrication required                      | 52          |
| GM1-functionalized liposome assay                         | 0.34 ng/mL | 3.5 h             | High sensitivity; liposome preparation required                                    | 53          |
| Electrospun carbon nanofiber electrochemical immunosensor | 1.25 pg/mL | ~20 min           | Extremely sensitive; complex electrode fabrication                                 | 40          |
| Graphene-based electrochemical biosensor                  | ~1 nM      | ~5 min            | Rapid response; graphene surface modification required                             | 47          |
| Present work                                              | 58.8 ng/mL | <40 min           | Reagent-free during measurement; no amplification or complex electrode fabrication | This work   |
